# Supplementary material
Source: Research Square preprint supplement (doi:10.21203/rs.3.rs-9709413/v1)
Supplement: Supplementary file 1 [file 7881bc413f19331564ac9d85.docx]

|  | ROUND 1 | |  | ROUND 2 | |  | ROUND 3 | |
| --- | --- | --- | --- | --- | --- | --- | --- | --- |
| **Professionals** | n | % |  | n | % |  | n | % |
| Total | 114 | 100 |  | 74 | 100 |  | 45 | 100 |
| **Location (work)** |  |  |  |  |  |  |  |  |
| New Zealand | 7 | 6% |  | 4 | 5% |  | 3 | 7% |
| Australia | 107 | 94% |  | 70 | 95% |  | 42 | 93% |
| Total | 114 | 1 |  | 74 | 100% |  | 45 | 100% |
| NSW/ACT | 52 | 49% |  | 32 | 46% |  | 15 | 36% |
| VIC | 29 | 27% |  | 19 | 27% |  | 12 | 29% |
| QLD | 9 | 8% |  | 8 | 11% |  | 6 | 14% |
| SA | 2 | 2% |  | 2 | 3% |  | 2 | 5% |
| TAS | 0 | 0% |  | 0 | 0% |  | 0 | 0% |
| NT | 1 | 1% |  | 0 | 0% |  | 0 | 0% |
| WA | 13 | 12% |  | 8 | 11% |  | 7 | 17% |
| Did not respond | 1 | 1% |  | 1 | 1% |  | 0 | 0% |
| Total | 107 | 100% |  | 70 | 100% |  | 42 | 1 |
| **Gender** |  |  |  |  |  |  |  |  |
| Male | 19 | 17% |  | 14 | 19% |  | 11 | 24% |
| Female | 95 | 83% |  | 60 | 81% |  | 34 | 76% |
| Prefer not to say | 0 | 0% |  | 0 | 0% |  | 0 | 0% |
| Total | 114 | 100% |  | 74 | 100% |  | 45 | 100% |
| **Area of professional expertise*** |  |  |  |  |  |  |  |  |
| Basic science research | 23 |  |  | 13 |  |  | 9 |  |
| Public health | 47 |  |  | 31 |  |  | 17 |  |
| Public policy | 28 |  |  | 20 |  |  | 14 |  |
| Epidemiology | 33 |  |  | 25 |  |  | 16 |  |
| Clinical care | 85 |  |  | 57 |  |  | 33 |  |
| Clinical research | 52 |  |  | 37 |  |  | 26 |  |
| Other | 3 |  |  | 2 |  |  | 2 |  |
| Total | 271 |  |  | 185 |  |  | 117 |  |
| **Clinical background** |  |  |  |  |  |  |  |  |
| Midwife | 17 | 13% |  | 8 | 9% |  | 3 | 5% |
| GP | 20 | 15% |  | 16 | 18% |  | 6 | 11% |
| Obstetrician/gynaecologist | 10 | 7% |  | 8 | 9% |  | 6 | 11% |
| Audiologist | 1 | 1% |  | 1 | 1% |  | 1 | 2% |
| Infectious disease specialist | 15 | 11% |  | 10 | 11% |  | 7 | 12% |
| Neonatologist | 4 | 3% |  | 2 | 2% |  | 2 | 4% |
| Paediatrician | 21 | 15% |  | 14 | 16% |  | 7 | 12% |
| Neurologist | 0 | 0% |  | 0 | 0% |  | 0 | 0% |
| Ear Nose and Throat physician | 3 | 2% |  | 1 | 1% |  | 1 | 2% |
| Clinical psychologist | 1 | 1% |  | 1 | 1% |  | 0 | 0% |
| Allied health | 9 | 7% |  | 5 | 6% |  | 5 | 9% |
| Virologist | 5 | 4% |  | 3 | 3% |  | 4 | 7% |
| Laboratory scientist | 6 | 4% |  | 2 | 2% |  | 2 | 4% |
| Other | 9 | 7% |  | 5 | 6% |  | 3 | 5% |
| Not a clinician | 15 | 11% |  | 13 | 15% |  | 10 | 18% |
| Total | 136 | 100% |  | 89 | 100% |  | 57 | 100% |
| **Years of practice** |  |  |  |  |  |  |  |  |
| 0-5 years | 3 | 3% |  | 1 | 1% |  | 0 | 0% |
| 6-10 years | 12 | 12% |  | 7 | 9% |  | 2 | 4% |
| 11-15 years | 17 | 16% |  | 11 | 15% |  | 6 | 13% |
| 15+ years | 64 | 62% |  | 42 | 57% |  | 27 | 60% |
| N/A | 8 | 8% |  | 13 | 18% |  | 10 | 22% |
| Total | 104 | 100% |  | 74 | 100% |  | 45 | 100% |
| **Main language spoken at home** |  |  |  |  |  |  |  |  |
| English | 108 | 95% |  | 71 | 96% |  | 42 | 93% |
| Mandarin | 1 | 1% |  | 1 | 1% |  | 1 | 2% |
| Cantonese | 1 | 1% |  | 0 | 0% |  | 0 | 0% |
| Tamil | 1 | 1% |  | 1 | 1% |  | 1 | 2% |
| Marathi | 1 | 1% |  | 1 | 1% |  | 1 | 2% |
| Sinhala | 1 | 1% |  | 0 | 0% |  | 0 | 0% |
| French | 0 | 0% |  | 0 | 0% |  | 0 | 0% |
| Did not say | 1 | 1% |  | 0 | 0% |  | 0 | 0% |
| Total | 114 | 100% |  | 74 | 100% |  | 45 | 100% |
| **Country of birth** |  |  |  |  |  |  |  |  |
| Australia | 72 | 63% |  | 43 | 58% |  | 25 | 56% |
| New Zealand | 9 | 8% |  | 5 | 7% |  | 4 | 9% |
| United Kingdom | 8 | 7% |  | 7 | 9% |  | 4 | 9% |
| India | 3 | 3% |  | 3 | 4% |  | 3 | 7% |
| China | 3 | 3% |  | 3 | 4% |  | 1 | 2% |
| Hong Kong | 1 | 1% |  | 1 | 1% |  | 0 | 0% |
| Malaysia | 5 | 4% |  | 5 | 7% |  | 2 | 4% |
| South Africa | 1 | 1% |  | 0 | 0% |  | 0 | 0% |
| USA | 3 | 3% |  | 3 | 4% |  | 2 | 4% |
| Kenya | 1 | 1% |  | 1 | 1% |  | 1 | 2% |
| Italy | 2 | 2% |  | 0 | 0% |  | 1 | 2% |
| Nigeria | 2 | 2% |  | 1 | 1% |  | 1 | 2% |
| Other | 4 | 4% |  | 2 | 3% |  | 1 | 2% |
| Total | 114 | 100% |  | 74 | 100% |  | 45 | 100% |
| **Ethnicity** |  |  |  |  |  |  |  |  |
| New Zealand European | 8 | 100% |  | 4 | 100% |  | 3 | 100% |
| Maori | 0 | 0% |  | 0 | 0% |  | 0 | 0% |
| Total | 8 | 100% |  | 4 | 100% |  | 3 | 100% |
| **Aboriginal** |  |  |  |  |  |  |  |  |
| Yes | 1 | 1% |  | 1 | 1% |  | 1 | 2% |
| No | 71 | 62% |  | 43 | 58% |  | 24 | 53% |
| Prefer not to say | 42 | 37% |  | 30 | 41% |  | 20 | 44% |
| Total | 114 | 100% |  | 74 | 100% |  | 45 | 100% |
|  |  |  |  |  |  |  |  |  |
| **People with lived experience** |  |  |  |  |  |  |  |  |
| Total | 28 | 100% |  | 23 | 100% |  | 15 | 100% |
| **Type of lived experience** |  |  |  |  |  |  |  |  |
| Parent or caregiver of someone impacted by CMV | 18 | 64% |  | 16 | 70% |  | 11 | 73% |
| Sibling of someone impacted by CMV | 0 | 0% |  | 0 | 0% |  | 0 | 0% |
| Grandparent of someone impacted by CMV | 2 | 7% |  | 1 | 4% |  | 1 | 7% |
| I have been impacted by CMV | 6 | 21% |  | 4 | 17% |  | 2 | 13% |
| Other | 2 | 7% |  | 2 | 9% |  | 1 | 7% |
| Total | 28 | 100% |  | 23 | 100% |  | 15 | 100% |
| **Location (home)** |  |  |  |  |  |  |  |  |
| New Zealand | 0 | 0% |  | 0 | 0% |  | 0 | 0% |
| Australia | 28 | 100% |  | 23 | 100% |  | 15 | 100% |
| Total | 28 | 100% |  | 23 | 100% |  | 15 | 100% |
| NSW/ACT | 10 | 36% |  | 8 | 35% |  | 7 | 47% |
| VIC | 5 | 18% |  | 5 | 22% |  | 4 | 27% |
| QLD | 6 | 21% |  | 4 | 17% |  | 2 | 13% |
| SA | 3 | 11% |  | 3 | 13% |  | 0 | 0% |
| TAS | 1 | 4% |  | 0 | 0% |  | 0 | 0% |
| NT | 0 | 0% |  | 0 | 0% |  | 0 | 0% |
| WA | 3 | 11% |  | 3 | 13% |  | 2 | 13% |
| Total | 28 | 100% |  | 23 | 100% |  | 15 | 100% |
| **Age group** |  |  |  |  |  |  |  |  |
| 18 - 29 years | 0 | 0% |  | 0 | 0% |  | 0 | 0% |
| 30 -39 years | 19 | 68% |  | 17 | 74% |  | 11 | 73% |
| 40 - 49 years | 3 | 11% |  | 2 | 9% |  | 2 | 13% |
| 50 - 59 years | 3 | 11% |  | 2 | 9% |  | 1 | 7% |
| 60+ years | 3 | 11% |  | 2 | 9% |  | 1 | 7% |
| Prefer not to say | 0 | 0% |  | 0 | 0% |  | 0 | 0% |
| Total | 28 | 100% |  | 23 | 100% |  | 15 | 100% |
| **Gender** |  |  |  |  |  |  |  |  |
| Male | 1 | 4% |  | 1 | 4% |  | 1 | 7% |
| Female | 27 | 96% |  | 22 | 96% |  | 14 | 93% |
| Prefer not to say | 0 | 0% |  | 0 | 0% |  | 0 | 0% |
| Total | 28 | 100% |  | 23 | 100% |  | 15 | 100% |
| **Main language spoken at home** |  |  |  |  |  |  |  |  |
| English | 27 | 96% |  | 22 | 96% |  | 14 | 93% |
| French | 1 | 4% |  | 1 | 4% |  | 1 | 7% |
| Did not say | 0 | 0% |  | 0 | 0% |  | 0 | 0% |
| Total | 28 | 100% |  | 23 | 100% |  | 15 | 100% |
| **Country of birth** |  |  |  |  |  |  |  |  |
| Australia | 22 | 79% |  | 18 | 78% |  | 11 | 73% |
| United Kingdom | 5 | 18% |  | 4 | 17% |  | 3 | 20% |
| Other | 1 | 4% |  | 1 | 4% |  | 1 | 7% |
| Total | 28 | 100% |  | 23 | 100% |  | 15 | 100% |
| **Ethnicity** |  |  |  |  |  |  |  |  |
| New Zealand European | 0 | 0% |  | 0 | 0% |  | 0 | 0% |
| Māori | 0 | 0% |  | 0 | 0% |  | 0 | 0% |
| **Aboriginal** |  |  |  |  |  |  |  |  |
| Yes | 0 | 0% |  | 0 | 0% |  | 0 | 0% |
| No | 22 | 79% |  | 18 | 78% |  | 11 | 73% |
| Prefer not to say | 6 | 21% |  | 5 | 22% |  | 4 | 27% |
| Total | 28 | 100% |  | 23 | 100% |  | 15 | 100% |

*Categories are not mutually exclusive

**Appendix 2**: Demographic characteristics of PWLE and professional participants Round 1-3
