# Supplementary material
Source: Research Square preprint supplement (doi:10.21203/rs.3.rs-9709413/v1)
Supplement: Supplementary file 2 [file 7c8407e8d7213d6256fd636b.docx]

Advisory Committee established.

Study design co-developed and ethics approved

Round 1 survey developed and tested

June

Round 1 survey distribution

June-July 2025: open 5 weeks

June

June

Analysis and categorisation of Round 1 survey responses

**For people with lived experience**

Online consultation meeting: about collated topics and proposed phrasing to research questions

Survey development and pilot testing of Round 2

Round 2 survey distribution

Sept 2025: open 4 weeks

Analysis of Round 2 survey responses

Survey development and pilot testing of Round 3

Round 3 survey distribution

Oct-Nov 2025: open 3 weeks

Analysis of Round 3 survey responses. Research priorities ranked in order of importance

**Data Analysis**

**Appendix 1**: Overview of the Delphi study process
