# Supplementary material
Source: Research Square preprint supplement (doi:10.21203/rs.3.rs-9709413/v1)
Supplement: Supplementary file 3 [file 86f797e70f45f7ce8e3afbf8.docx]

| Consensus high priority questions for **People with Lived Experience** | | | | | Consensus high priority questions for **Professionals** | | | | |
| --- | --- | --- | --- | --- | --- | --- | --- | --- | --- |
| Question | Category | Median | IQR | Mean | Question | Category | Median | IQR | Mean |
| 1. What is the most effective treatment for congenital CMV in-utero? | Maternal treatment | 7 | 0 | 6.90 | 1. What is the ideal delivery strategy for a CMV vaccine (i.e. timing of the vaccine and duration of protection)? | Vaccine | 7 | 1 | 6.52 |
| 1. What are the risks and benefits for the fetus following maternal anti-viral treatment for CMV during pregnancy? | Maternal treatment | 7 | 0.25 | 6.80 | 1. Will CMV mRNA vaccines have any long-term safety concerns? | Vaccine | 7 | 1 | 6.49 |
| 1. How can we ensure all maternity health professionals have the knowledge and confidence to routinely counsel all women, partners and families about CMV risks and prevention strategies? | Awareness | 7 | 0 | 6.78 | 1. What are the most effective public health messages for the prevention of CMV? | Awareness | 7 | 1 | 6.48 |
| 1. How can we ensure that **GP**s have the knowledge and confidence to routinely counsel all women, partners and families about CMV risks and prevention strategies? | Awareness | 7 | 0 | 6.78 | 1. Who should be the target population for a CMV vaccination (e.g. women planning pregnancy, pregnant people, or children)? | Vaccine | 7 | 1 | 6.44 |
| 1. What impact does valacyclovir treatment given in the first trimester to women with primary CMV infection have on the long-term health outcomes of the babies? | Maternal treatment | 7 | 1 | 6.75 | 1. Does the mRNA CMV vaccine (currently being trialled) prevent the acquisition of primary CMV infection in women? | Vaccine | 7 | 1 | 6.35 |
| 1. What early intervention is recommended for babies born with congenital CMV? | Neonatal | 7 | 1 | 6.70 | 1. Can a CMV vaccine be developed to prevent infection and subsequent congenital CMV-related disability? | Vaccine | 7 | 1 | 6.35 |
| 1. What are the long-term outcomes for babies whose mothers are treated with valacyclovir during pregnancy (with known fetal transmission)? | Neonatal | 7 | 1 | 6.70 | 1. Can we identify and implement a uniform standard of practice re CMV screening, detection, treatment and response across hospitals and health clinics to ensure that all pregnant women have the same opportunities and support to ensure they can make informed choices? | Antenatal screening | 6 | 1 | 6.34 |
| 1. For babies born with suspected congenital CMV, how can the CMV testing process be improved to ensure early identification and intervention? | Neonatal | 7 | 1 | 6.68 | 1. What is the efficacy and safety of antenatal antiviral treatment on a CMV infected fetus? | Maternal treatment | 6 | 1 | 6.30 |
| 1. Should CMV screening during pregnancy be routine practice? | Antenatal screening | 7 | 0 | 6.65 | 1. What is the best pathway for the management/treatment of CMV infection during pregnancy in Aust and NZ? | Maternal treatment | 6 | 1 | 6.30 |
| 1. What are the long-term effects of CMV in the newborn of the mother who contracts it for the first time in pregnancy? | Neonatal | 7 | 1 | 6.60 | 1. What is the most effective, acceptable and cost-effective antenatal CMV screening model for Aust and NZ (e.g. whether and when to screen/test, how many times, ability to be implemented outside of tertiary hospitals, plus or minus antenatal counselling/education)? | Antenatal screening | 6 | 1 | 6.29 |
| 1. How can we ensure that midwives have the knowledge and confidence to routinely counsel all women, partners and families about CMV risks and prevention strategies? | Awareness | 7 | 0 | 6.57 | 1. What is the most effective and feasible congenital CMV screening option for neonates in Aust and NZ (e.g. Guthrie cards, are there techniques that can be improved locally, what is the most accurate method in the lab to have the highest sensitivity and specificity )? | Neonatal | 6 | 1 | 6.24 |
| 1. What supports do families need when facing challenging ethical decisions after a CMV diagnosis in pregnancy (e.g. termination for medical reasons)? | Fetal  prognosis | 7 | 1 | 6.533 | 1. What systems are required to ensure that GPs counsel pregnant women, those planning a pregnancy and their families about CMV prevention in pregnancy? | Awareness | 6 | 1 | 6.23 |
| 1. How can clear and accessible information be provided about maternal treatment options for CMV during pregnancy and possible outcomes for the baby? | Maternal treatment | 7 | 1 | 6.526 | 1. Do newer antivirals (maribavir, letermovir) prevent mother to child transmission? | Maternal Treatment | 6 | 1 | 6.22 |
| 1. What model of CMV screening in pregnancy would have the best outcomes? | Antenatal screening | 7 | 1 | 6.524 | 1. Can we develop improved pathways for early diagnosis of fetal CMV? | Antenatal screening | 6 | 1 | 6.20 |
| 1. Will a vaccine for CMV be effective in preventing congenital CMV? | Vaccine | 7 | 0.25 | 6.50 | 1. How can we develop and implement national guidelines for managing congenital CMV, including protocols for hearing surveillance, neurodevelopmental monitoring, and antiviral therapy? | Neonatal | 6 | 1 | 6.19 |
| 1. What is the ideal time for neonatal anti-viral treatment for congenital CMV? At what age is treatment no longer beneficial? | Neonatal | 7 | 1 | 6.50 | 1. Can we develop a predictive model to estimate the risk of long-term outcomes like cerebral palsy, hearing loss, or microcephaly following a fetal cCMV diagnosis, to support informed pregnancy decisions and reduce uncertainty? | Fetal  prognosis | 6 | 1 | 6.16 |
| 1. Are women at a high-risk of CMV infection (e.g. childcare workers) currently being screened for CMV during pregnancy? | Antenatal screening | 7 | 1 | 6.47 | 1. What are the outcomes of symptomatic and asymptomatic congenital CMV infection and how do outcomes differ depending on whether the mother and/or infant were treated with antivirals? | Neonatal | 6 | 1 | 6.16 |
| 1. Will a CMV vaccine be feasible and equitably available at the right time? | Vaccine | 7 | 1 | 6.47 | 1. What are the long-term patterns of disability progression, including hearing loss and sensory, motor and neurodevelopmental issues (including severity) in infants with congenital CMV? | Long term outcomes | 6 | 1 | 6.16 |
| 1. How effective would routine CMV screening and education for women of childbearing age (or during early pregnancy) be in preventing congenital CMV infections? | Antenatal screening | 7 | 1 | 6.43 | 1. What are the key ingredients for effective implementation of antenatal CMV counselling in health systems? | Awareness | 6 | 1 | 6.16 |
| 1. What strategies should be used to encourage health professionals to test more women for CMV during pregnancy? | Antenatal screening | 7 | 1 | 6.43 | 1. What are the most effective strategies for educating maternity health professionals about CMV and prevention in pregnancy? | Awareness | 6 | 1 | 6.16 |
| 1. What would be the impact of routine pre-conception CMV serological screening? | Antenatal screening | 7 | 1 | 6.43 | 1. How do we improve clinician skills in counselling and having helpful discussions about CMV with parents and families (e.g not increasing potential guilt/ shame and acknowledging parental preferences)? | Awareness | 6 | 1 | 6.14 |
| 1. What is the lived experience of children impacted by cCMV? | Neonatal | 7 | 1 | 6.40 | 1. Can we identify/predict which babies with asymptomatic congenital CMV will be/are at risk of long-term sequelae? | Longterm outcomes | 6 | 1 | 6.13 |
| 1. How can we most effectively raise awareness of CMV in early pregnancy-or even before conception? | Awareness | 7 | 1 | 6.39 | 1. What is the best (effective, safe, feasible) treatment program for infants with congenital CMV, specifically which infants should be treated with antivirals (symptomatic, asymptomatic, isolated hearing loss only)? | Neonatal | 6 | 1 | 6.10 |
| 1. What diagnostic tools can accurately assess the severity of CMV infection in fetuses to support decision-making during pregnancy? | Fetal  prognosis | 7 | 1 | 6.35 | 1. What are the long-term side effects and benefits for infants with congenital CMV who were treated with antivirals postnatally? | Longterm outcomes | 6 | 1 | 6.09 |
| 1. How can families best be supported emotionally and practically and be best prepared for possible/probable outcomes, following a CMV diagnosis in pregnancy? | Fetal  prognosis | 7 | 1 | 6.35 | 1. Can we prevent congenital CMV following maternal nonprimary infection? | Maternal treatment | 6 | 1 | 6.07 |
| 1. How many babies die soon after birth as result of congenital CMV (infant mortality)? | Neonatal | 6 | 1 | 6.35 | 1. Can a CMV vaccine reduce non-primary CMV infections (specifically reactivations)? | Vaccine | 6 | 1 | 6.02 |
| 1. What would be the most useful way for families to receive information and recommendations about a CMV diagnosis during pregnancy (e.g. what tests can be done, when they need to done, what can they tell us and what treatment options are available)? | Maternal treatment | 6 | 1 | 6.30 | 1. How do we increase awareness of CMV in the services that women and their children access? | Awareness | 6 | 1 | 5.96 |
| 1. How early can we detect severe birth defects caused by congenital CMV? | Fetal  prognosis | 7 | 1 | 6.26 | 1. What is the real-world data on use and outcome of high dose acyclovir in pregnancy (including long term outcomes on uninfected, exposed infants)? | Maternal treatment | 6 | 0.25 | 5.93 |
| 1. What is the best way to educate and empower women to ask their GP/ Midwife/ Obstetrician to be screened for CMV? | Awareness | 6 | 1 | 6.26 | 1. Are there factors that increase the risk of disability in the fetus/infant following maternal CMV infection? | Fetal  prognosis | 6 | 0.25 | 5.91 |
| 1. How could public health campaigns and maternity health professionals most effectively provide CMV education messages without creating additional feelings of fear, guilt and blame among families? | Awareness | 7 | 1 | 6.20 | 1. What are the most effective strategies for educating women and families about CMV pre-conceptually? | Awareness | 6 | 1 | 5.89 |
| 1. Can fetal imaging findings predict long term outcomes for a fetus with congenital CMV, thereby assisting parents to make informed decisions? | Fetal  prognosis | 7 | 1 | 6.20 |  |  |  |  |  |
| 1. What evidence can be gathered across all ages and stages to support informed decision making? | Fetal  prognosis | 6 | 1 | 6.00 |  |  |  |  |  |
| 1. Do GPs know the management pathways for when a woman tests positive / negative to CMV in pregnancy? | Antenatal screening | 7 | 1 | 5.95 |  |  |  |  |  |
| 1. How long should people wait to conceive after having CMV and what counselling is required for people affected in this way? | Awareness | 6 | 1 | 5.87 |  |  |  |  |  |
| 1. How confident do GPs feel about interpreting CMV serology results? | Antenatal screening | 6 | 1 | 5.81 |  |  |  |  |  |

**Appendix 3**: A complete list of the 65 high priority consensus research questions for PWLE and professionals, listed in order of importance.
